# Supplementary material for: A Conserved Endoplasmic Reticulum Membrane Protein Complex (EMC) Facilitates Phospholipid Transfer from the ER to Mitochondria
Source: PLoS Biol. 2014 Oct 14;12(10):e1001969. doi: 10.1371/journal.pbio.1001969 (PMC4196738; doi:10.1371/journal.pbio.1001969)
Supplement: Table S13 — Strains and plasmids used in this study. (XLS) [file pbio.1001969.s019.xls]

## Sheet: Sheet1 - Table 1
Strain	Genotype	Source
∆cho2	Y7092 cho2∆::URA3
∆emc6	Y7092 emc6∆::URA3
ALE1-GFP	Y7043 ALE1-GFP::HIS5
ALE1-VF1	Y7043 ALE1-VF2::URA3
BY4741	MATa his3∆1 leu2∆ met15∆ ura3∆
EMC1-GFP	Y7043 EMC1-GFP::HIS5
EMC1-VF1	BY4741 EMC1-VF1::HIS5
EMC1-VF2	Y7043 EMC1-VF2::URA3
EMC2-GFP	Y7043 EMC2-GFP::HIS5
EMC2-VF1	BY4741 EMC2-VF1::HIS5
EMC2-VF2	Y7043 EMC2-VF2::URA3
EMC3-GFP	Y7043 EMC3-GFP::HIS5
EMC3-VF1	BY4741 EMC3-VF1::HIS5
EMC3-VF2	Y7043 EMC3-VF2::URA3
EMC4-GFP	Y7043 EMC4-GFP::HIS5
EMC4-VF1	BY4741 EMC4-VF1::HIS5
EMC5-GFP	Y7043 EMC5-GFP::HIS5
EMC5-VF2	Y7043 EMC5-VF2::URA3
EMC6-GFP	Y7043 EMC6-GFP::HIS5
EMC6-VF1	BY4741 EMC6-VF1::HIS5
EMC6-VF2	Y7043 EMC6-VF2::URA3
MDM12-RFP	BY4741 MDM12-RFP::natMX
TOM5∆TM-VF1	BY4741 TOM5∆TM-VF1::HIS5
VF1-TOM5	BY4741 HIS5::PHO5p-VF1-TOM5
Y7043	Mat alpha can1∆::STE2pr-leu2 lyp1∆ cyh2 his3∆ leu2∆ met15∆ ura3∆	Tong, A. H. & Boone, C. Synthetic genetic array analysis in Saccharomyces cerevisiae. Methods Mol. Biol. 313, 171–192 (2006).
Y7092	Mat alpha can1∆::STE2pr-Sp-his5 lyp1∆ his3∆ leu2∆ met15∆ ura3∆	Tong, A. H. & Boone, C. Synthetic genetic array analysis in Saccharomyces cerevisiae. Methods Mol. Biol. 313, 171–192 (2006).
BY4741	MATa his3∆1 leu2∆0 met15∆0 ura3∆0	Invitrogen
BY4742	MATa his3∆1 leu2∆0 lys2∆5 ura3∆0	Invitrogen
YSL1	BY4741 emc1::HIS5
YSL2	BY4741 emc2::hygMX4
YSL3	BY4741 emc3::HIS5
YSL58	BY4741 emc5::kanMX4	Invitrogen
YSL59	BY4741 emc6::kanMX4	Invitrogen
YSL4	BY4741 emc1::HIS5 emc5::kanMX4
YSL5	BY4741 emc3::HIS5 emc6::kanMX4
YSL6	BY4741 emc1::HIS5 emc2::hygMX4 emc5::kanMX4
YSL7	BY4742 emc4::kanMX4
YSL8	BY4742 emc3::HIS5 emc6::kanMX4
YSL9 (5x-emc)	BY4741 emc1::HIS5 emc2::hygMX4 emc3::HIS5 emc5::kanMX4 emc6::kanMX4
YSL27 (4x-emc)	BY4741 emc1::HIS5 emc2::hygMX4 emc3::his emc6::kanMX4
YSL36	BY4741 mmm1-1:Ca-URA3
YSL38	YSL9 mmm1-1: Ca-URA3
YSL57 (3x-emc)	BY4741 emc2::hygMX4 emc5::kanMX4 emc6::kanMX4
WPY442	BY4741 psd2::kanMX4	Invitrogen
WPY461	BY4742 psd1::kanMX4 psd2::kanMX4	lab collection
YSL101	BY4741 MMM1-GFP:URA3
YSL102	YSL9 MMM1-GFP:URA3
YSL108	BY4741 mdm10::kanMX4 MMM1-GFP:URA3
plasmids
pSL8	Expresses Psd2 under PSD2 promoter (URA3/CEN)
ChiMERA	Expresses chiMERA protein (URA3/CEN)	Kornmann et al., An ER-mitochondria tethering complex revealed by a synthetic biology screen. Science 325, 477-81(2009).
pSL13	Expresses ChiMERA protein (LEU2/CEN)
pWP1464	Expresses Mdm10-GFP under MDM10 promoter (URA3/CEN)	Voss et al., ER-shaping proteins facilitate lipid exchange between the ER and mitochondria in S. cerevisiae. J. Cell Sci. 25, 4791-9 (2012).
Mito-red	Expresses RFP in the mitochondrial matrix (LEU2CEN)	J. Nunnari
pMCZ-Y	Expresses lacZ under the KAR2 promter	Y. Ye
